# Supplementary material for: Dihydroartemisinin Inhibits mTORC1 Signaling by Activating the AMPK Pathway in Rhabdomyosarcoma Tumor Cells
Source: MDPI journal article supplement (doi:10.3390/cells10061363), 2021-06-01
Supplement: s1 [file s1]

Supplementary Material

# Dihydroartemisinin Inhibits mTORC1 Signaling by Activating the AMPK Pathway in Rhabdomyosarcoma Tumor Cells

Jun Luo <sup>1,2,†</sup>, Yoshinobu Odaka <sup>1,†,‡</sup>, Zhu Huang <sup>1,3,†</sup>, Bing Cheng <sup>1</sup>, Wang Liu <sup>1</sup>, Lin Li <sup>1</sup>, Chaowei Shang <sup>1</sup>, Chao Zhang <sup>1,4,5</sup>, Yang Wu <sup>1,6</sup>, Yan Luo <sup>1,6</sup>, Shengyong Yang <sup>6</sup>, Peter J. Houghton <sup>7</sup>, Xiaofeng Guo <sup>2,\*</sup> and Shile Huang <sup>1,8,\*</sup>

<sup>1</sup> Department of Biochemistry and Molecular Biology, Louisiana State University Health Sciences Center, Shreveport, LA 71130-3932, USA; junluo@scau.edu.cn (J.L.); odakayu@ucmail.uc.edu (Y.O.); huangzhu@xmu.edu.cn (Z.H.); bing.cheng@lsuhs.edu (B.C.); wliu6@kumc.edu (W.L.); lin.li@lsuhs.edu (L.L.); chaowei.shang@lsuhs.edu (C.S.); zhangchao@ahmu.edu.cn (C.Z.); wuyang@scu.edu.cn (Y.W.); yan.luo@mayo.edu (Y.L.)

<sup>2</sup> College of Veterinary Medicine, South China Agricultural University, Guangzhou 510642, China

<sup>3</sup> Research Center of Aquatic Organism Conservation and Water Ecosystem Restoration in Anhui Province, Anqing Normal University, Anqing 246011, China

<sup>4</sup> Key Laboratory of National Health and Family Planning Commission on Parasitic Disease Control and Prevention, Jiangsu Institute of Parasitic Diseases, Wuxi 214064, China

<sup>5</sup> Jiangsu Provincial Key Laboratory on Parasite and Vector Control Technology, Jiangsu Institute of Parasitic Diseases, Wuxi 214064, China

<sup>6</sup> State Key Laboratory of Biotherapy and Cancer Center, West China Hospital, Sichuan University, Chengdu 610041, China; yangsy@scu.edu.cn

<sup>7</sup> Greehey Children's Cancer Research Institute, University of Texas Health Science Center, San Antonio, TX 78229-3000, USA; houghtonp@uthscsa.edu

<sup>8</sup> Department of Hematology and Oncology, Louisiana State University Health Sciences Center, Shreveport, LA 71130-3932, USA

\* Correspondence: xfguo@scau.edu.cn (X.G.); shile.huang@lsuhs.edu (S.H.); Tel: +86-20-38295980 (X.G.); +1-318-675-7759 (S.H.)

† These authors contributed equally to this work.

‡ Current address: Biology Department, University of Cincinnati Blue Ash College, Blue Ash, OH 45236, USA

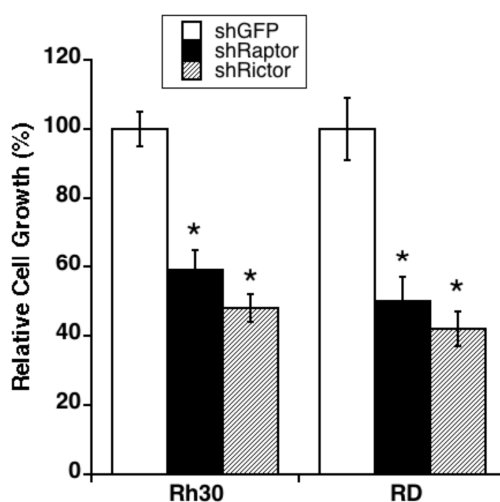

**Figure S1.** Knockdown of raptor or rictor inhibits RMS cell growth. Rh30 and RD cells, infected with lentiviral shRNA to raptor, rictor, or GFP (control), were seeded in 6-well plates (all at  $4 \times 10^4$  cells/well) and grown for 72 h, followed by cell counting using a Beckmann Coulter counter. Shown are mean values  $\pm$  SD ( $n = 3$ ). \* $p < 0.05$ , difference versus the control group (sh-GFP).

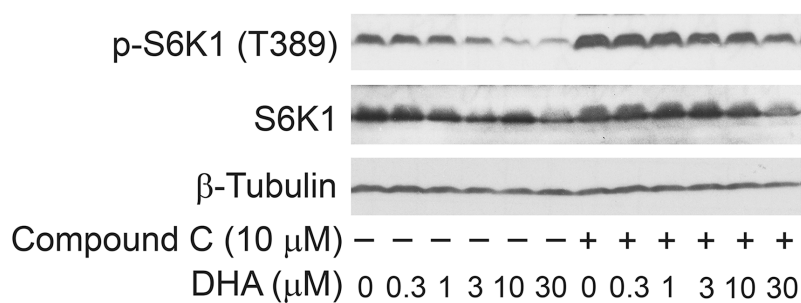

**Figure S2.** Inhibition of AMPK attenuates DHA-induced inhibition of mTORC1 in Rh30 cells. Rh30 cells were pretreated with Compound C (10 μM) for 2 h, and then exposed to DHA (0–30 μM) for 24 h. The cell lysates were subject to Western blotting with indicated antibodies.

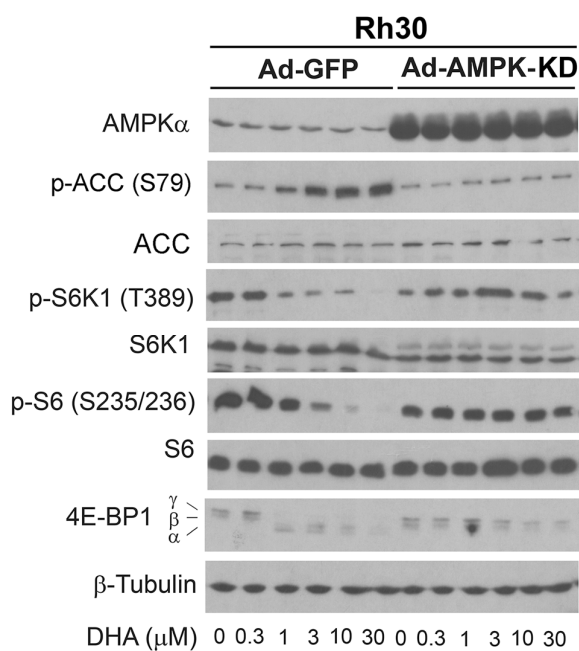

**Figure S3.** Ectopic expression of kinase-dead AMPK attenuates DHA-induced inhibition of mTORC1 in Rh30 cells. Rh30 cells were infected with recombinant adenovirus expressing myc-tagged kinase-dead AMPK (Ad-AMPK-KD) or GFP (Ad-GFP) for 24 h, and then treated with DHA (0–30 μM) for another 24 h, followed by Western blotting with indicated antibodies.

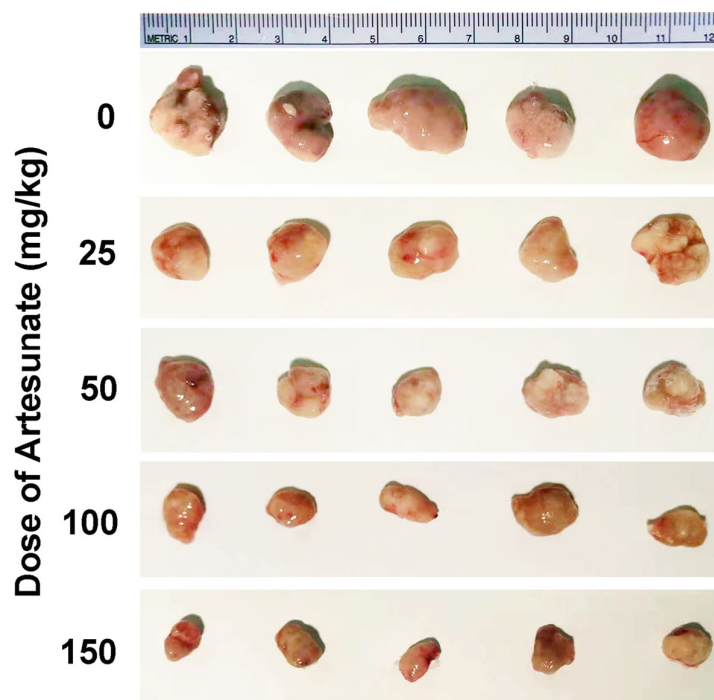

**Figure S4.** Artesunate inhibits the tumor growth of Rh30 xenografts in SCID mice. C.B.17SC *scid*<sup>-/-</sup> female mice (5~6 weeks old) bearing Rh30 xenografts were treated (i.p.) with artesunate at the indicated doses or vehicle (0.9%NaCl) once daily. At the end (Day 33) of the experiment, the mice were sacrificed and the tumor tissues were dissected. Shown are the representative images of isolated tumors.

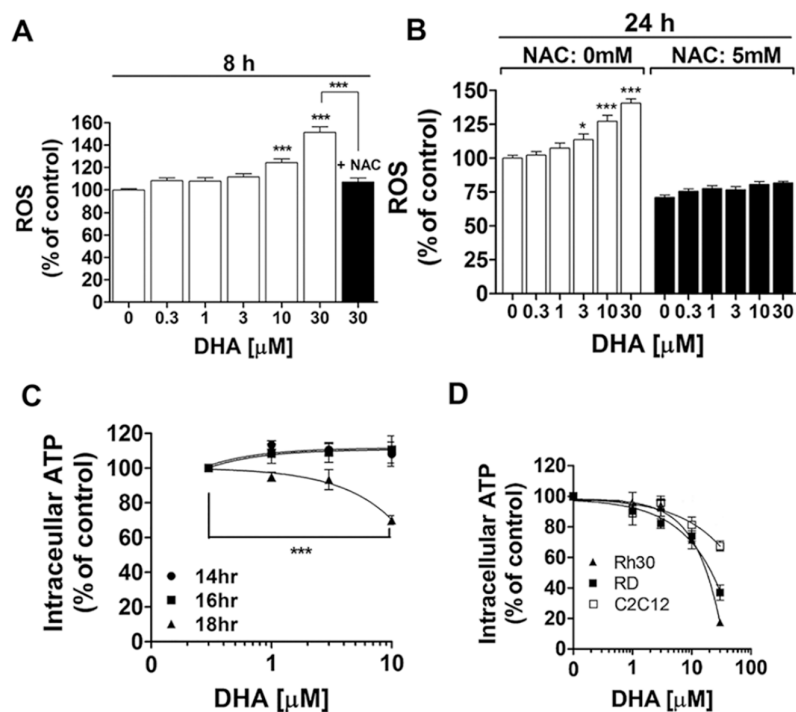

**Figure S5.** DHA increases cellular ROS and reduces ATP levels in tumor cells. (A,B) Rh30 cells were preloaded with CM-H<sub>2</sub>DCFDA (10 μM) for 30 min, followed by treatment with DHA (0-30 μM) in

the presence or absence of 5 mM NAC (N-acetyl cysteine) for 8 h (**A**) or 24 h (**B**), before ROS detection. (**C**) Rh30 cells were treated with DHA (0–10  $\mu$ M) for 14–18 h, (**D**) indicated cells were treated with DHA (0–30  $\mu$ M) for 24 h, followed by ATP assay using ATPlite™ Luminescence Assay System (PerkinElmer). Results are means  $\pm$  SE ( $n = 6$ ). \* $p < 0.05$ , \*\*\* $p < 0.001$ .
